# Supplementary material
Source: PubMed Central journal article supplement (PMC1482492)

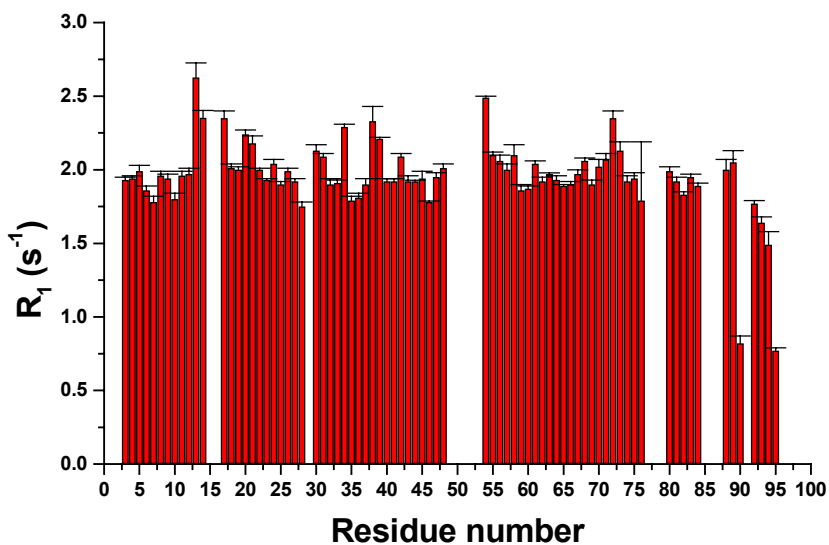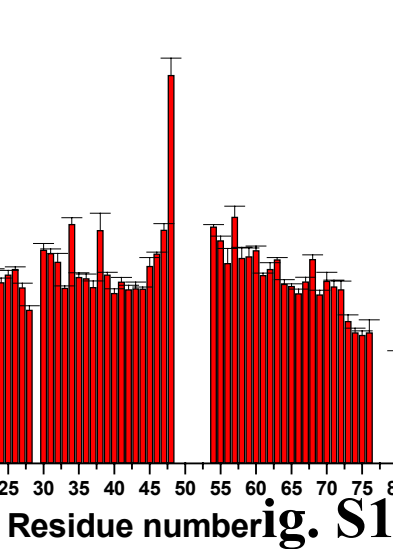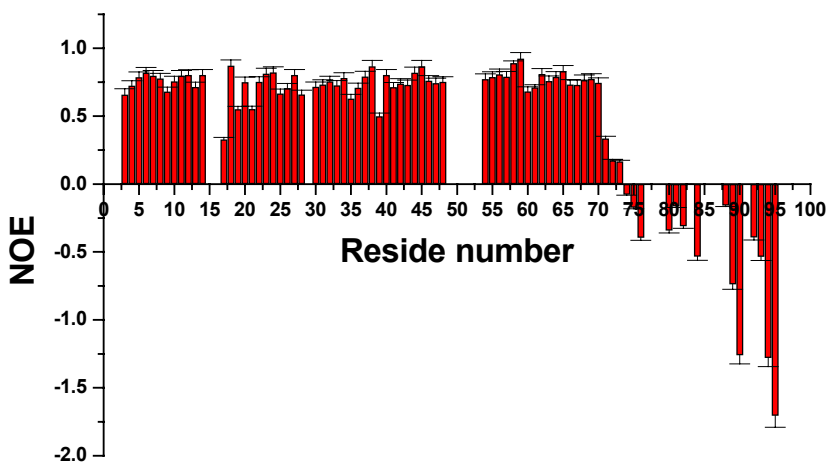

Supplement: pnas_0600142103_1.pdf [file pnas_0600142103_1.pdf]

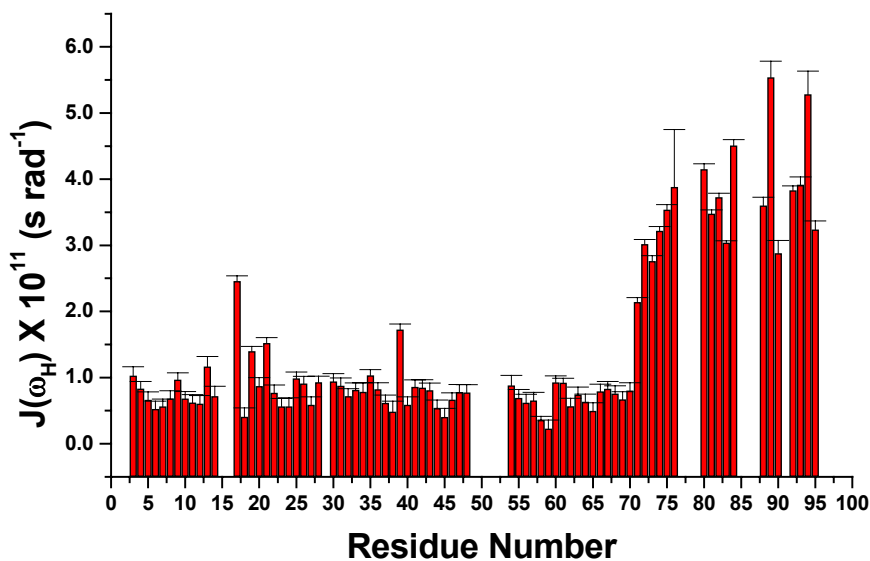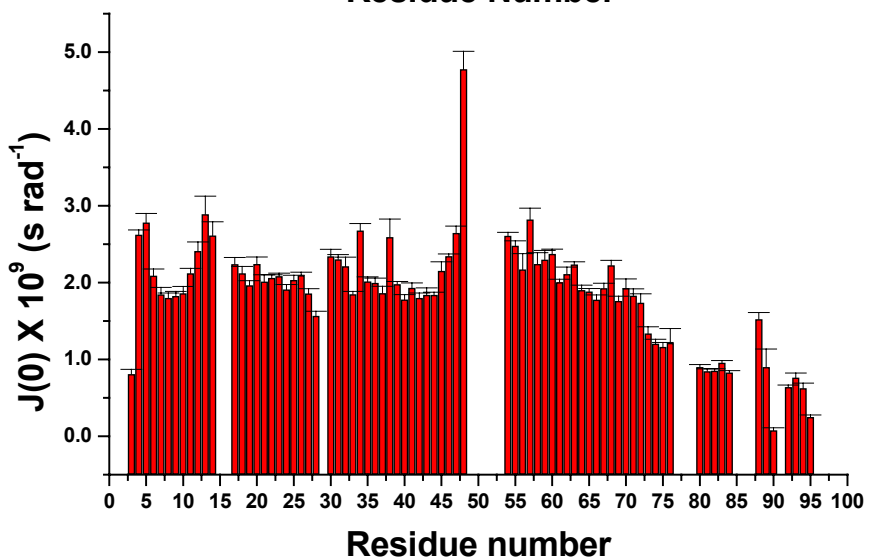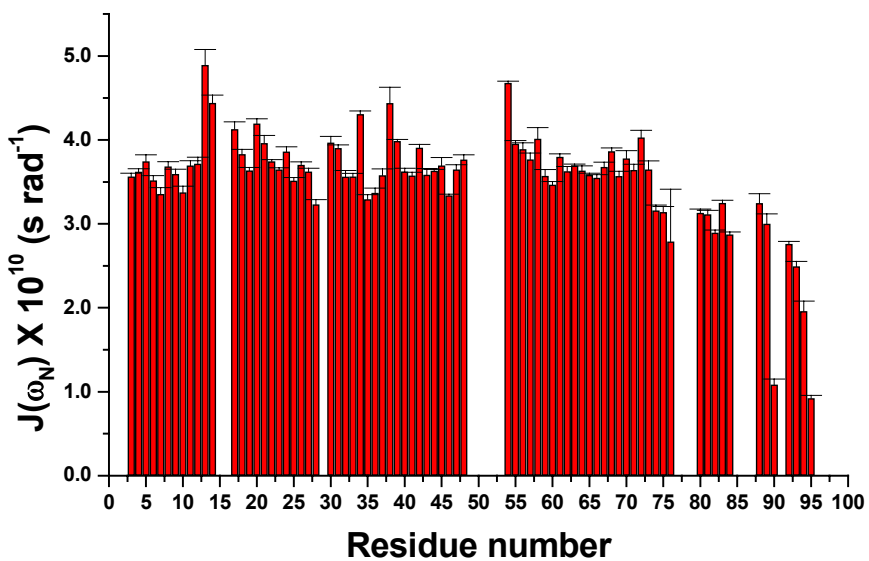

Supplement: pnas_0600142103_2.pdf [file pnas_0600142103_2.pdf]

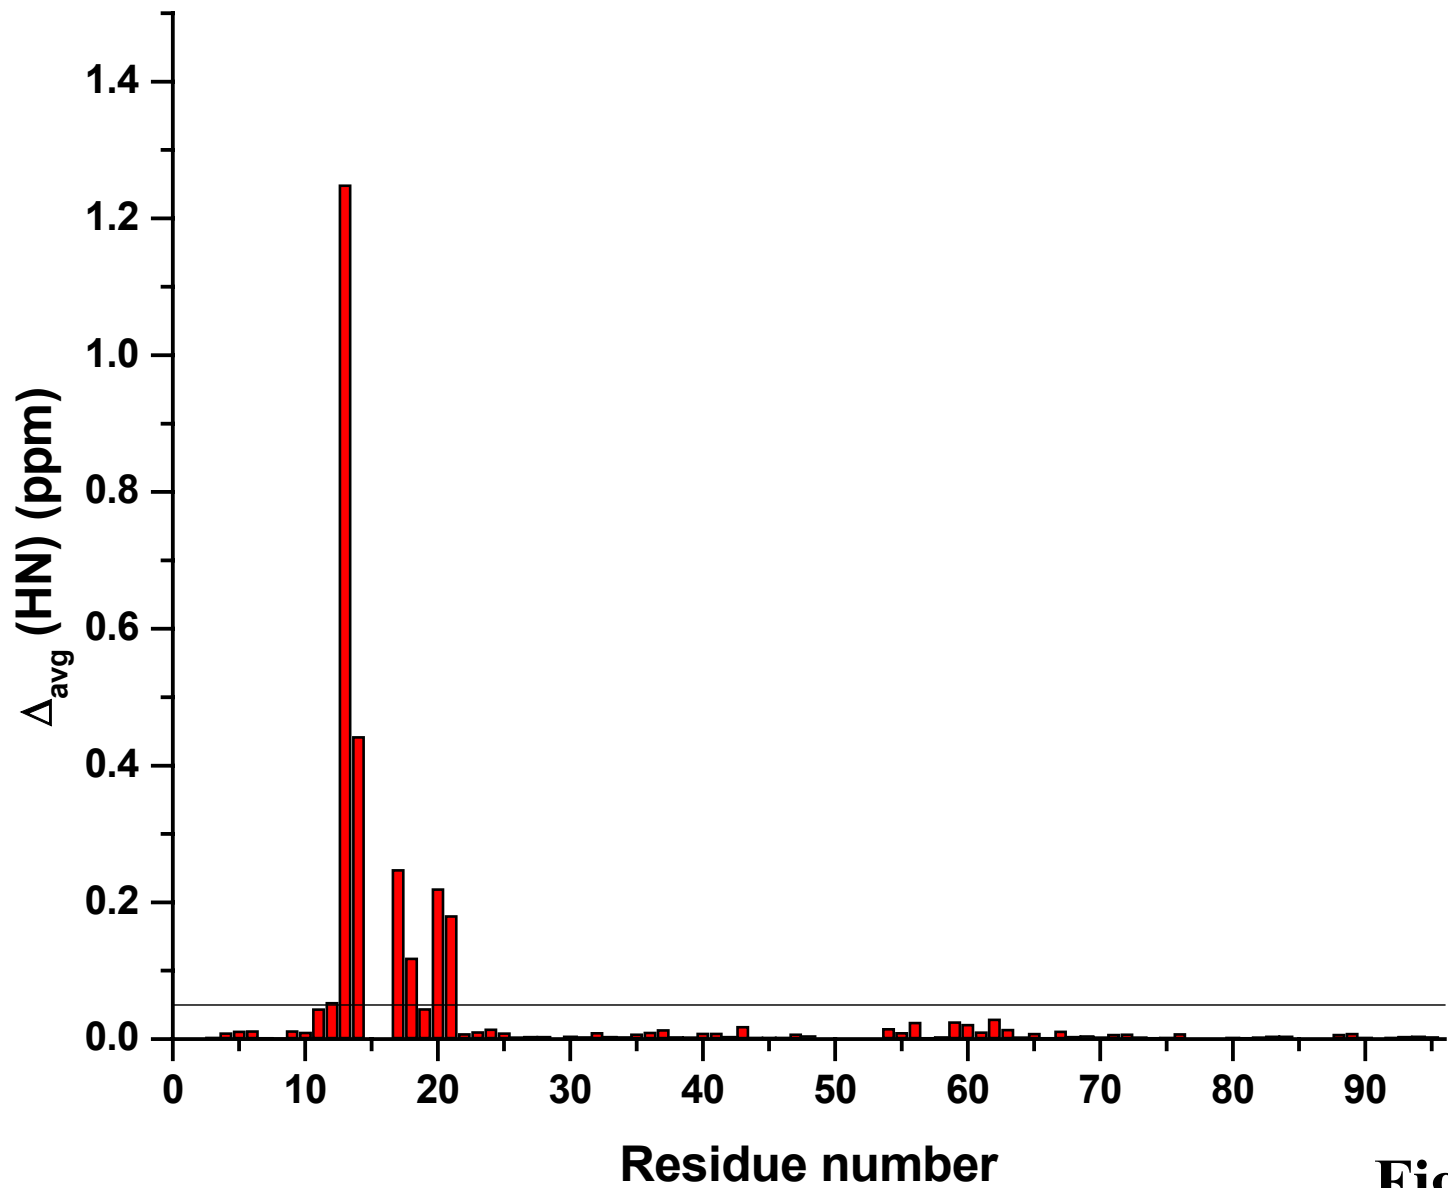

**Fig. S3**

Supplement: pnas_0600142103_3.pdf [file pnas_0600142103_3.pdf]

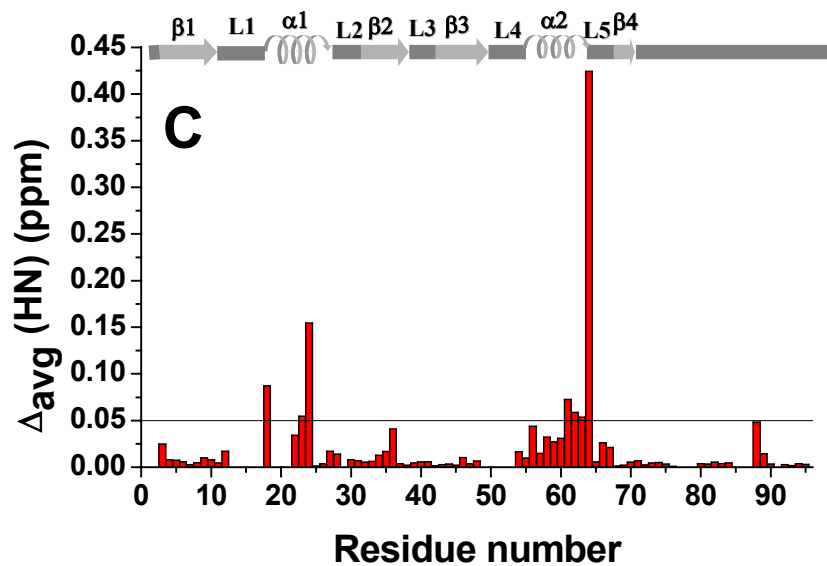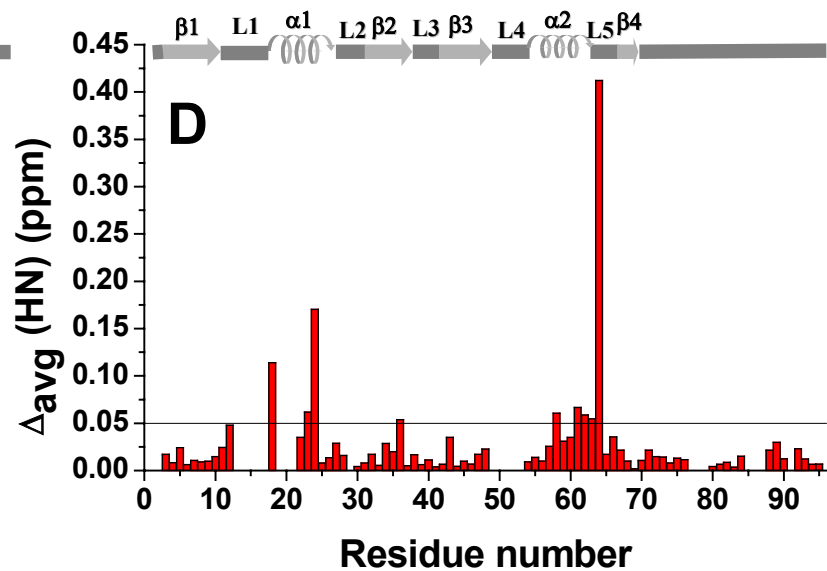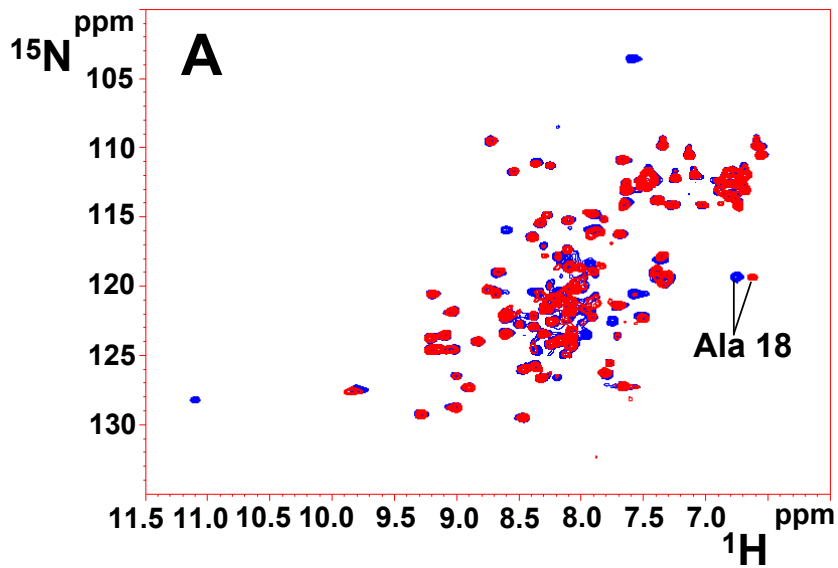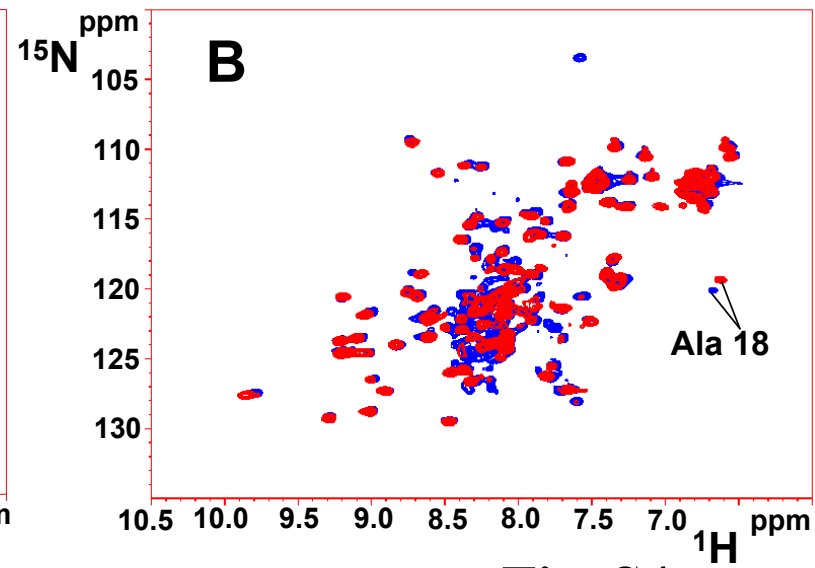

**Fig. S4**

Supplement: pnas_0600142103_4.pdf [file pnas_0600142103_4.pdf]

**$^{15}\text{N}$** 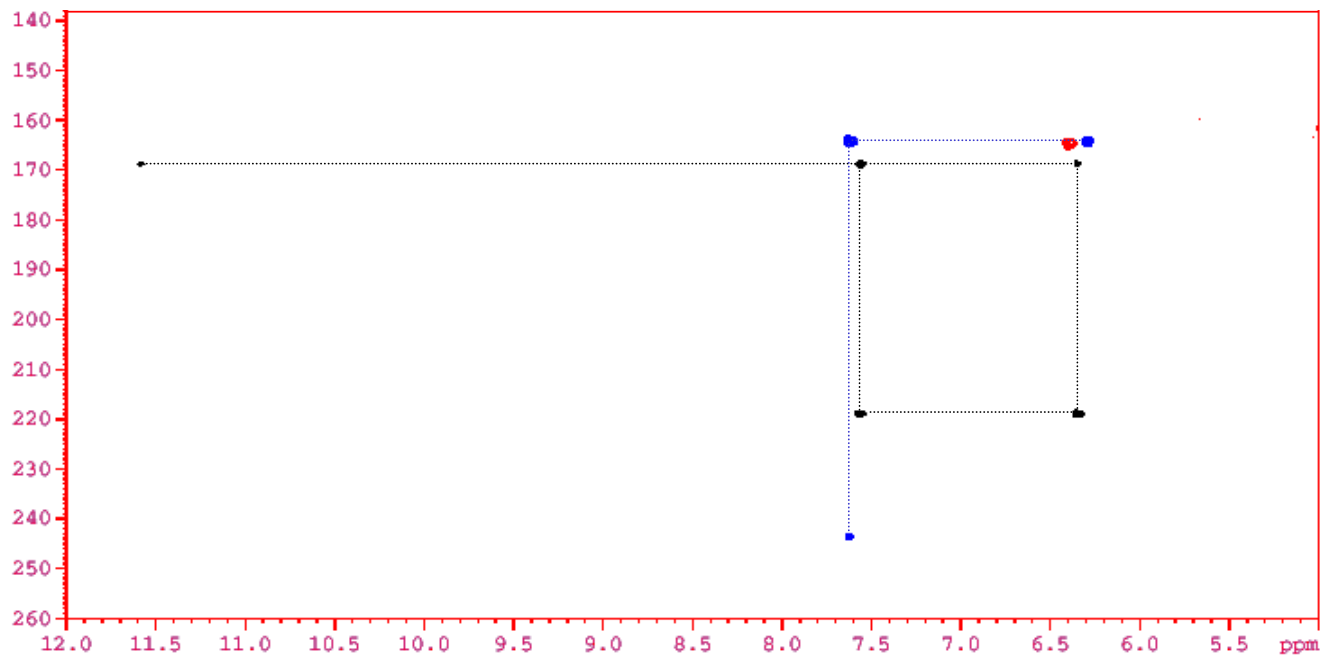 **$^1\text{H}$**

Supplement: pnas_0600142103_5.pdf [file pnas_0600142103_5.pdf]

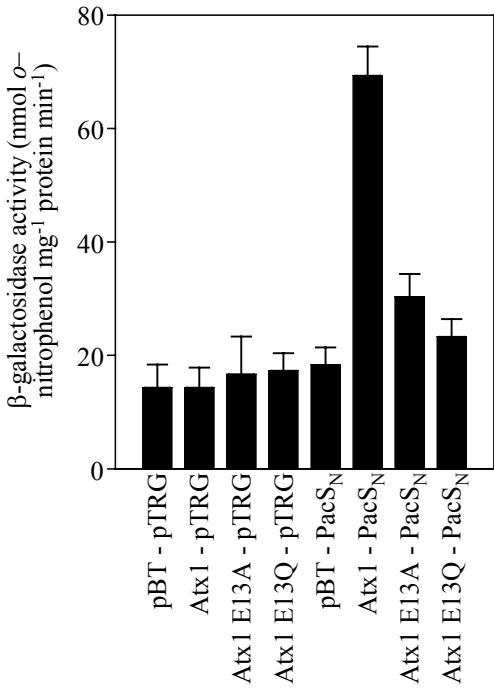

Supplement: pnas_0600142103_6.pdf [file pnas_0600142103_6.pdf]
